# Supplementary material for: Signatures of Convergent Evolution and Natural Selection at the Alcohol Dehydrogenase Gene Region are Correlated with Agriculture in Ethnically Diverse Africans
Source: PubMed Central journal article supplement (PMC9547508; doi:10.1093/molbev/msac183), 2022-08-26
Supplement: msac183_supplementary_data.pdf [file msac183_supplementary_data.pdf]

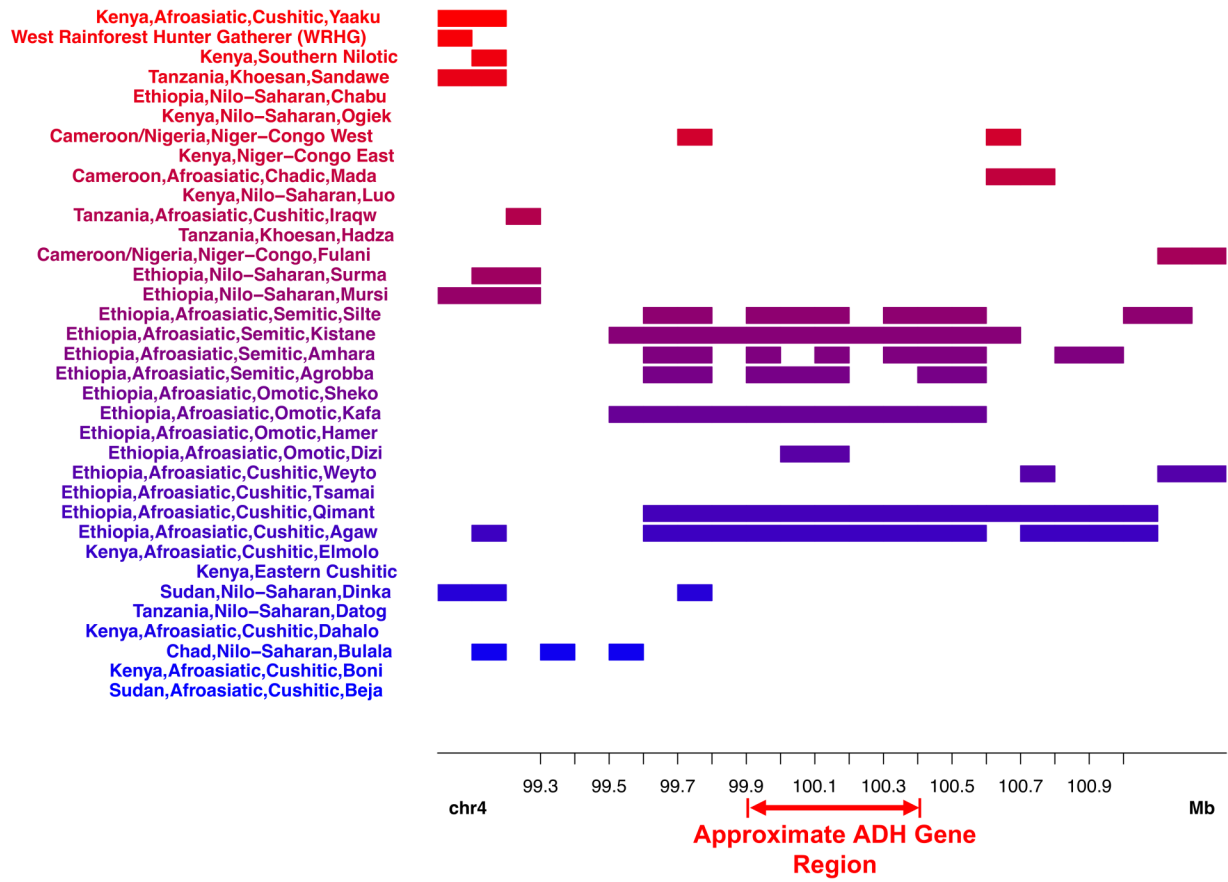

**Fig. S1.** Signature of elevated integrated haplotype score (iHS) across the ADH gene region in sub-Saharan Africans. Following Voight et al. (2006), we split the genome into non-overlapping 100kb windows, and for each population, we identified windows in the top 5% of the empirical distribution for the proportion of SNPs with extreme iHS scores ( $|\text{standardized iHS} > 2|$ ). If a 100kb window was in the top 5% in this analysis, we colored that window in the plot. These windows in the ADH region are confined to Ethiopian Afroasiatic-speaking populations.

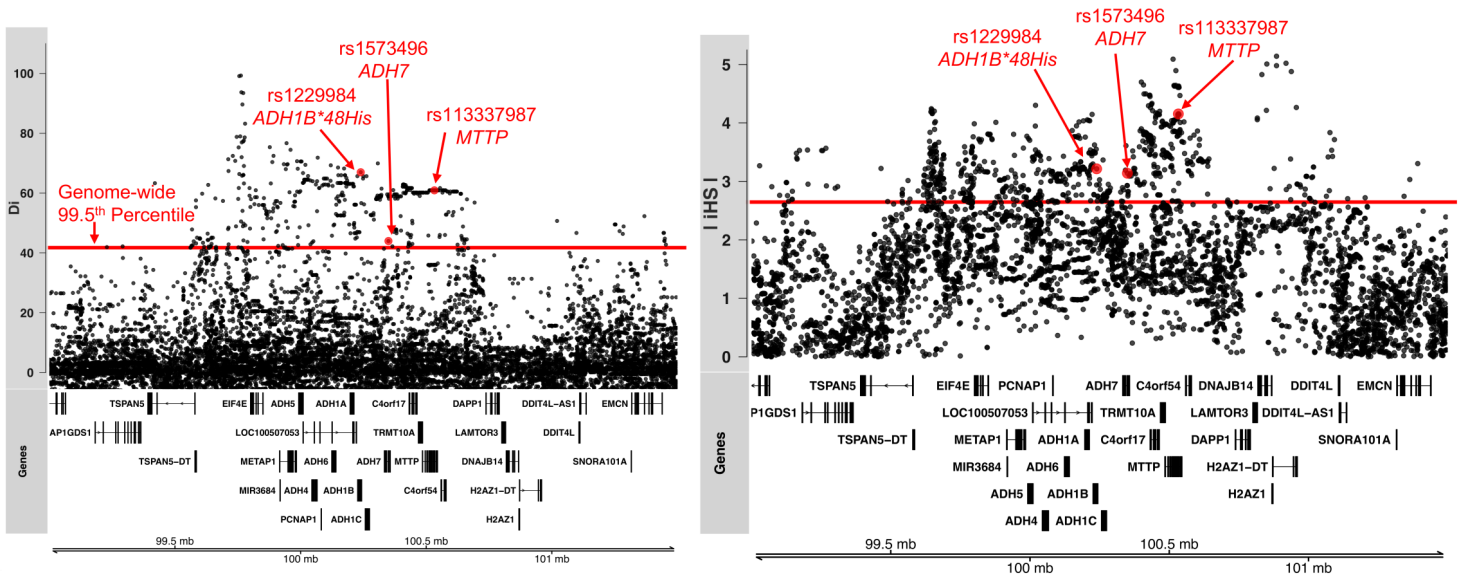

**Fig. S2.** Signatures of positive selection across the ADH gene region in the pooled Ethiopian Semitic/Cushitic population when filtering out all individuals with up to 3<sup>rd</sup> degree relationships ( $n=209$ ). (a)  $D_i$  statistic and (b)  $iHS$  scores show a ~1.5 Mb region of elevated scores across the ADH region. Red line denotes genome-wide empirical 99.5<sup>th</sup> percentile for each statistic, and nonsynonymous mutations discussed in the main text are highlighted red.

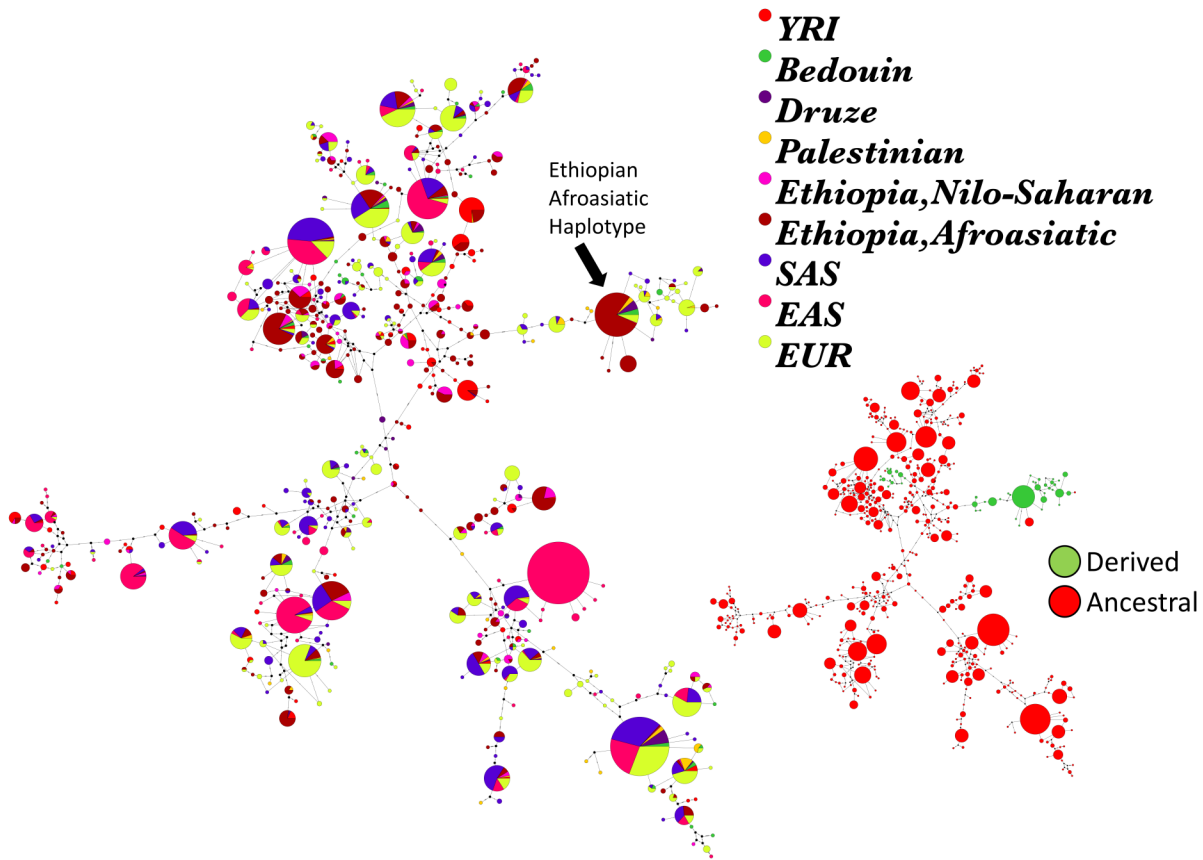

**Fig. S3.** 50kb median joining haplotype network around non-synonymous *ADH7* gene variant rs1573496 (112 SNPs). Larger network shows haplotypes colored by population, while smaller haplotype network is identical except that haplotypes are colored according to whether they carry the ancestral (red) or derived allele (green) at this locus. The Ethiopian Afroasiatic haplotype (dark red) carrying the derived allele is identical to a haplotype found in the Levant (Druze, Palestinian, Bedouin) and Europe (EUR), suggesting identity by descent.

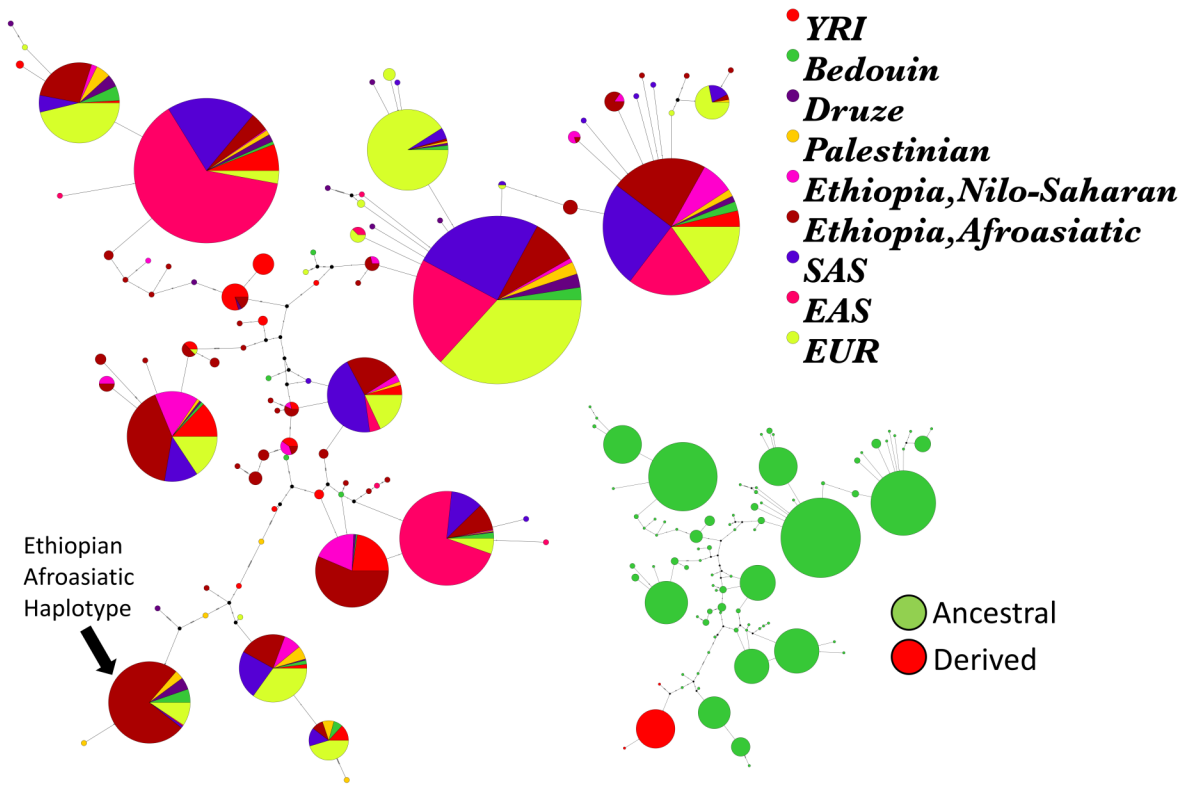

**Fig. S4.** 50kb median joining haplotype network around non-synonymous *MTTP* gene variant rs113337987 (102 SNPs). Larger network shows haplotypes colored by population, while smaller haplotype network is identical except that haplotypes are colored according to whether they carry the ancestral (green) or derived allele (red) at this locus. The Ethiopian Afroasiatic haplotype (dark red) carrying the derived allele is identical to a haplotype found in the Levant (Druze, Palestinian, Bedouin) and Europe (EUR), suggesting identity by descent.

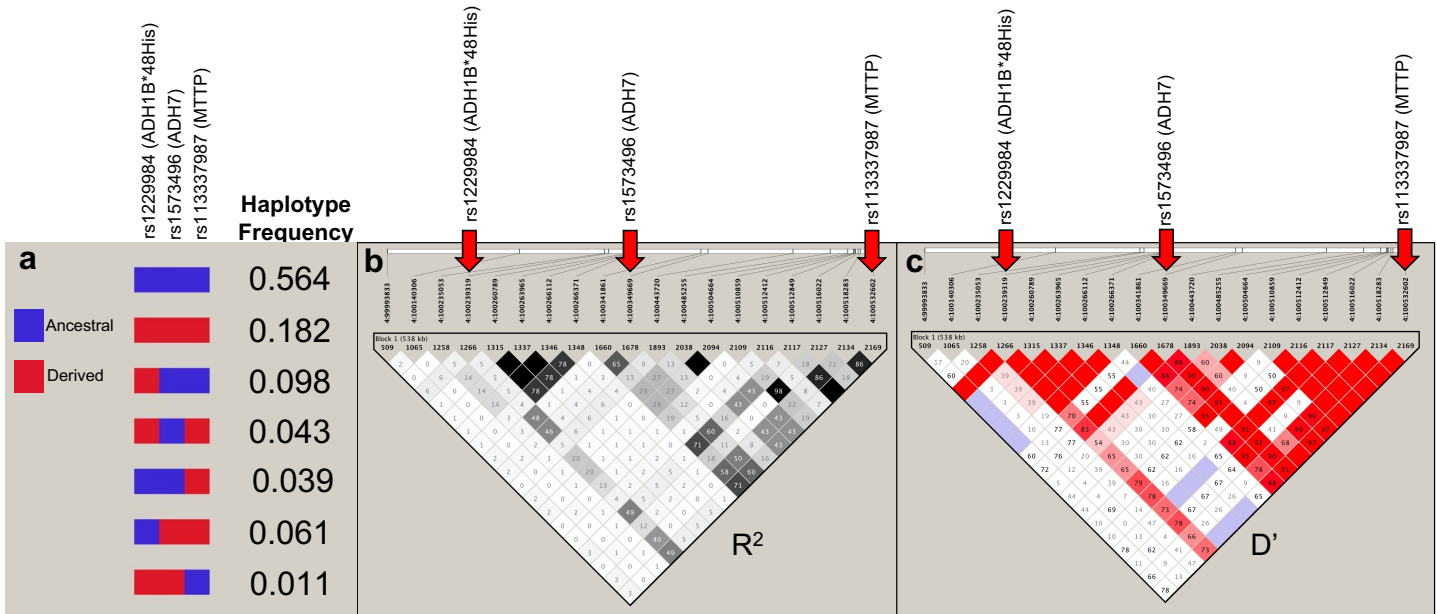

**Fig. S5.** Haplotype frequencies and patterns of linkage disequilibrium at the ADH gene region in the pooled Ethiopian Semitic/Cushitic population. **(a)** Haplotype frequencies at the three nonsynonymous variants showing the strongest positive selection signals. **(b)** Pairwise linkage disequilibrium ( $R^2$ ) among all variants listed in Table 1. Colors correspond to  $R^2$  value (black = 1, white = 0). **(c)** Pairwise linkage disequilibrium ( $D'$ ) among all variants listed in Table 1. Colors represent standard scheme in Haploview software and numbers in cells denote  $D'$ . Genetic positions are in the format 'chr:position' (hg19).

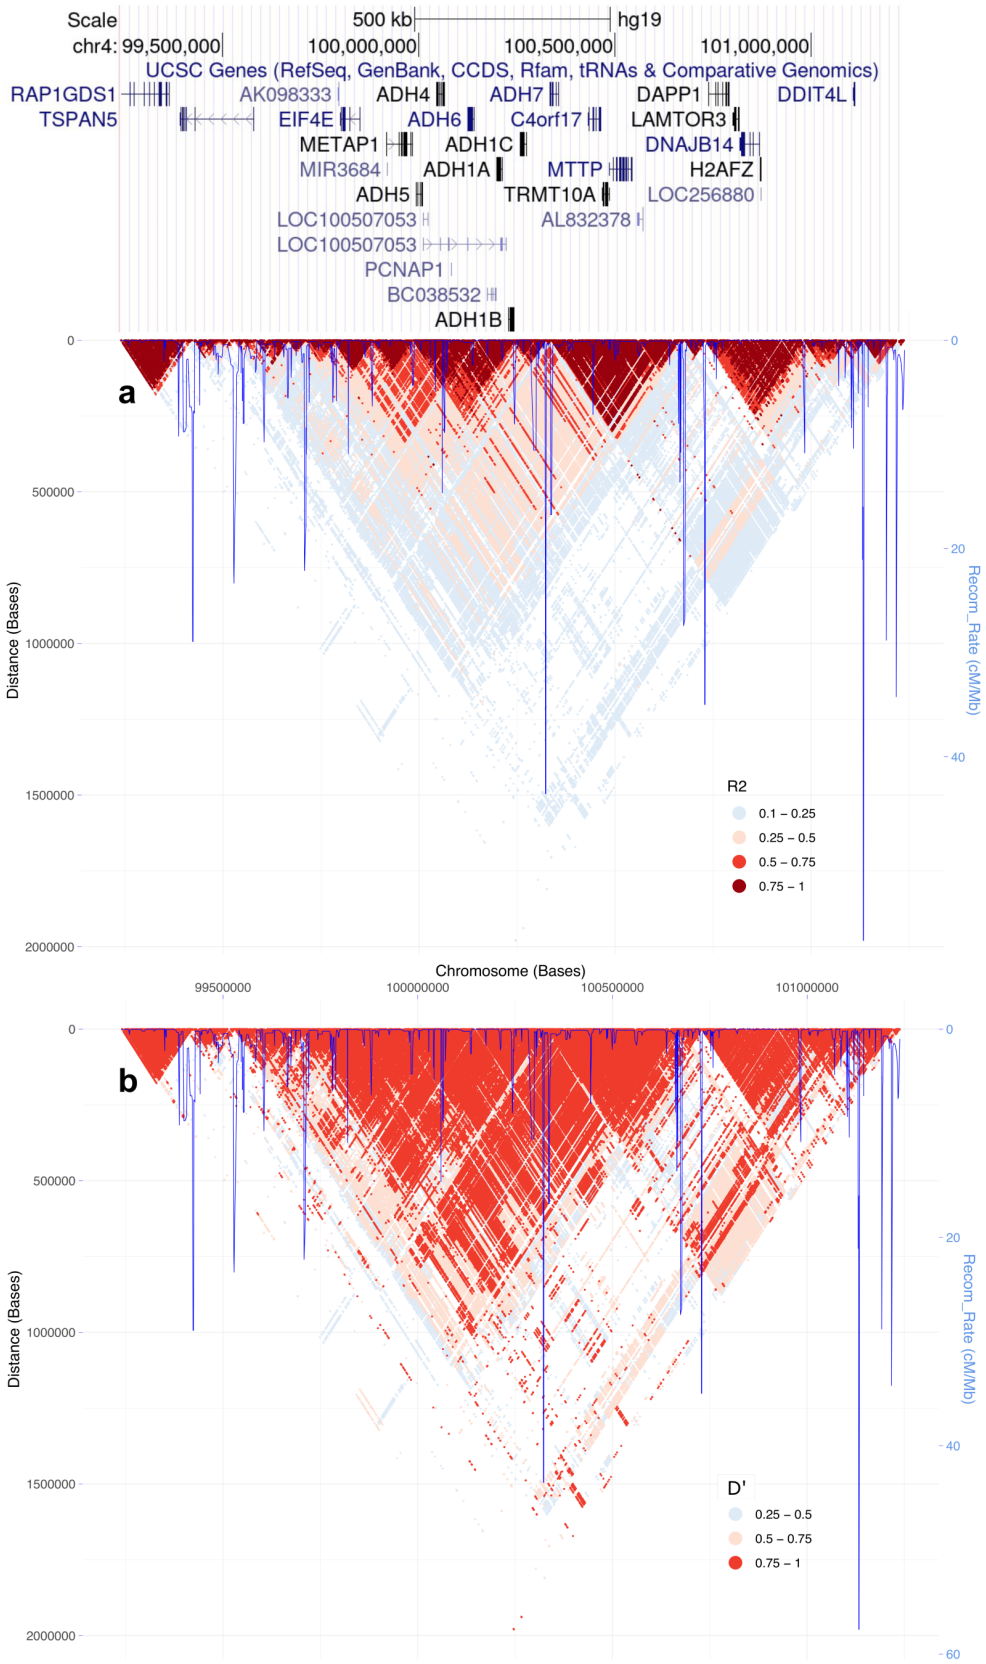

**Fig. S6.** Patterns of linkage disequilibrium (LD) across the ADH gene region in pooled Ethiopian Semitic/Cushitic population. **(a)**  $R^2$  across the ADH region. **(b)**  $D'$  across the ADH region. Recombination rate shown in blue.

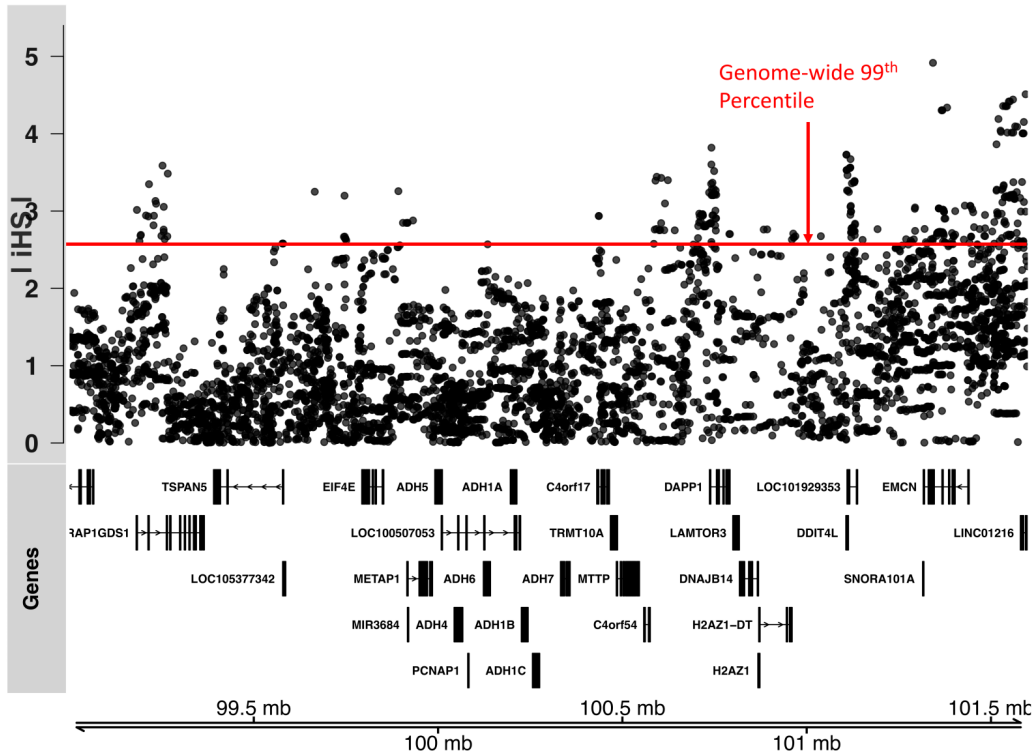

**Fig. S7.** Lack of signal of positive selection at the alcohol dehydrogenase gene region in the Weyto hunter-gatherers from Ethiopia. Integrated Haplotype Score (iHS) is shown in region surrounding alcohol dehydrogenase genes on chromosome 4. Very few SNPs in the ADH region show iHS scores above the genome-wide 99<sup>th</sup> percentile in this population.

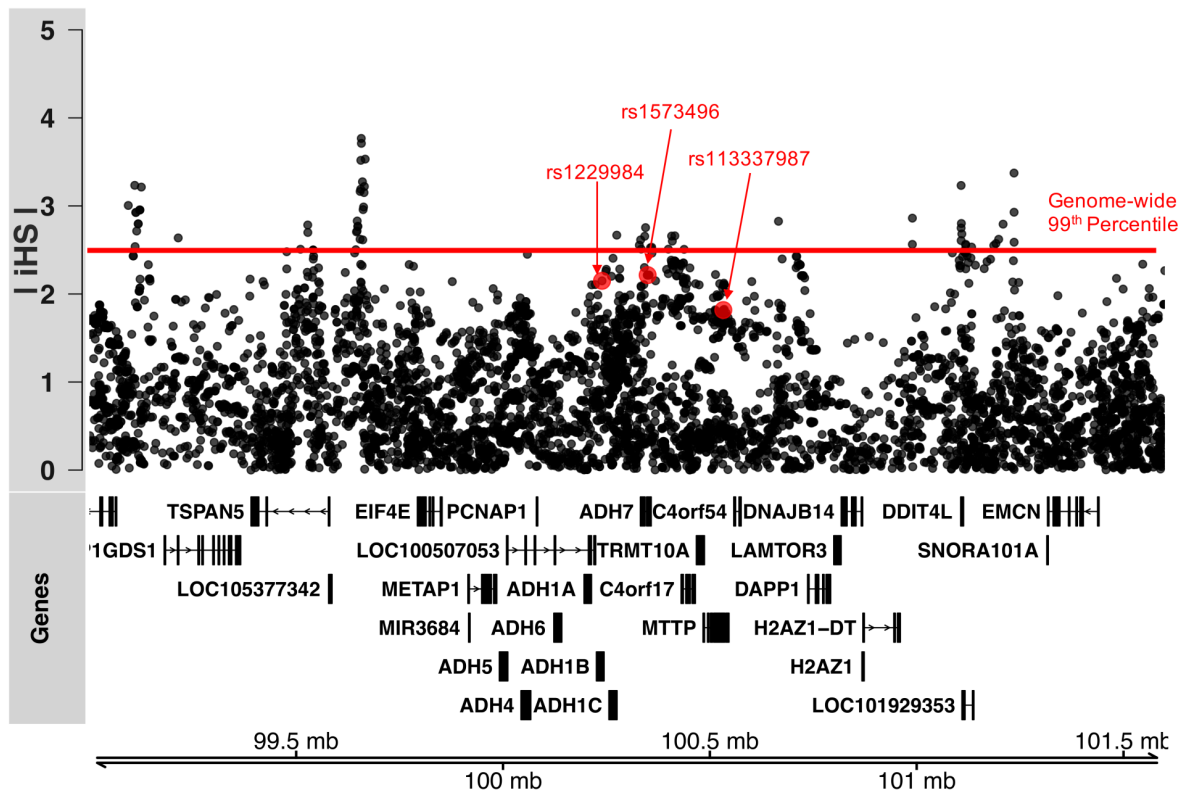

**Fig. S8.** Weaker signal of positive selection at the alcohol dehydrogenase gene region in the pastoralist Beja population from Kenya (contains Baniamer and Hadandawa ethnic groups). Integrated Haplotype Score (iHS) is shown in region surrounding alcohol dehydrogenase genes on chromosome 4. Very few SNPs in the ADH region show iHS scores above the genome-wide 99<sup>th</sup> percentile in this population.



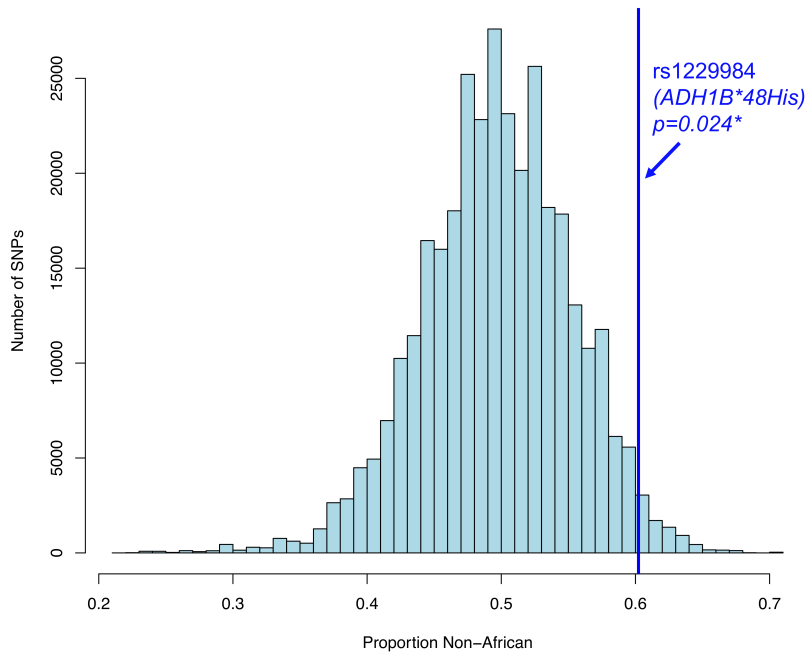

**Fig. S9.** Histogram showing the proportion of haplotypes in the pooled Ethiopian Semitic/Cushitic group inferred to be 'Non-African' at each SNP genome-wide. This analysis only contained variants with a MAF  $\geq 30\%$  and  $\leq 35\%$  in the focal Ethiopian Semitic/Cushitic population. Compared to the rest of the genome, the rs1229984 site (*ADH1B\*48His*) (blue vertical line) is at the tail-end of the empirical distribution for the proportion of haplotypes in the population inferred to be non-African, suggesting positive selection post-admixture.

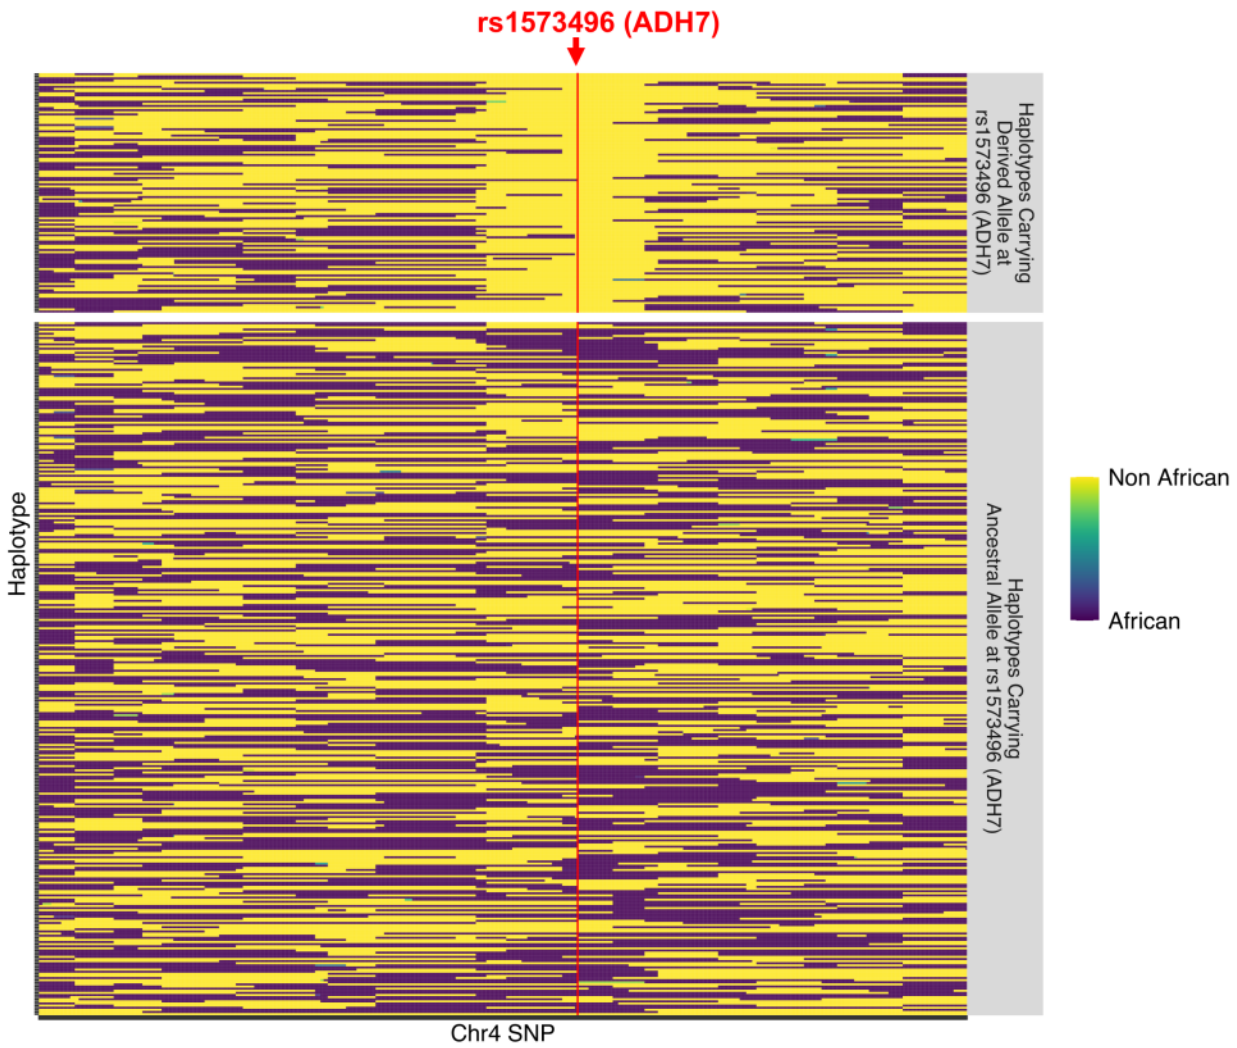

**Fig. S10.** RfMix local ancestry results showing enrichment in non-African ancestry at nonsynonymous SNP rs1573496 (*ADH7* gene). Each row is a haplotype, and the color of the haplotype represents African (purple) or non-African (yellow) ancestry inferred at each position along the haplotype. Haplotypes carrying the derived allele at rs1573496 are almost entirely inferred to be non-African in origin at this region.

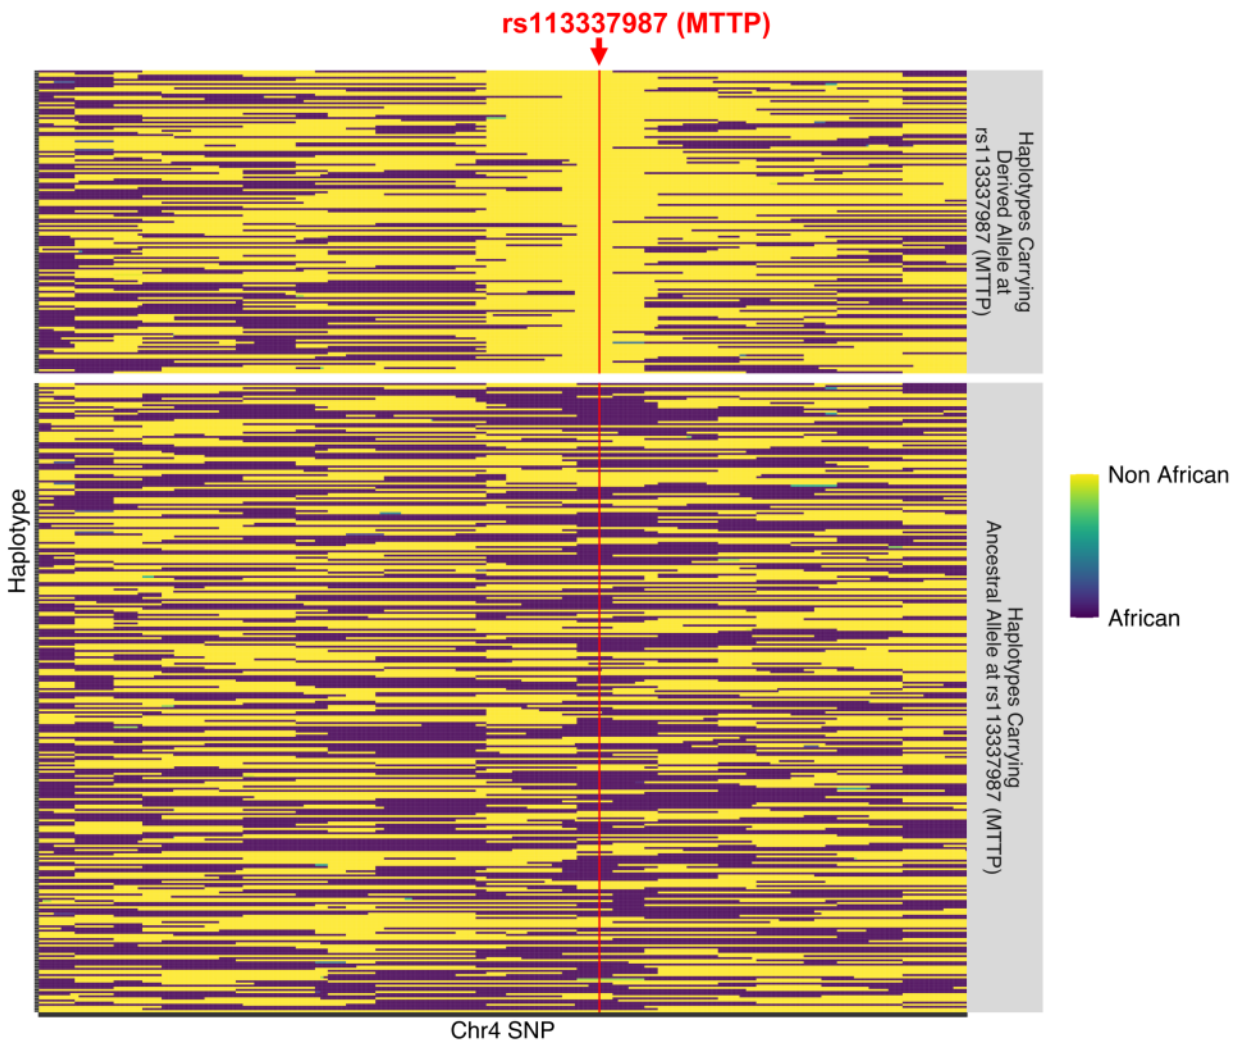

**Fig. S11.** RFmix local ancestry results showing enrichment in non-African ancestry at nonsynonymous SNP rs113337987 (MTTP gene). Each row is a haplotype, and the color of the haplotype represents African (purple) or non-African (yellow) ancestry inferred at each position along the haplotype. Haplotypes carrying the derived allele at rs113337987 are almost entirely inferred to be non-African in origin at this region.

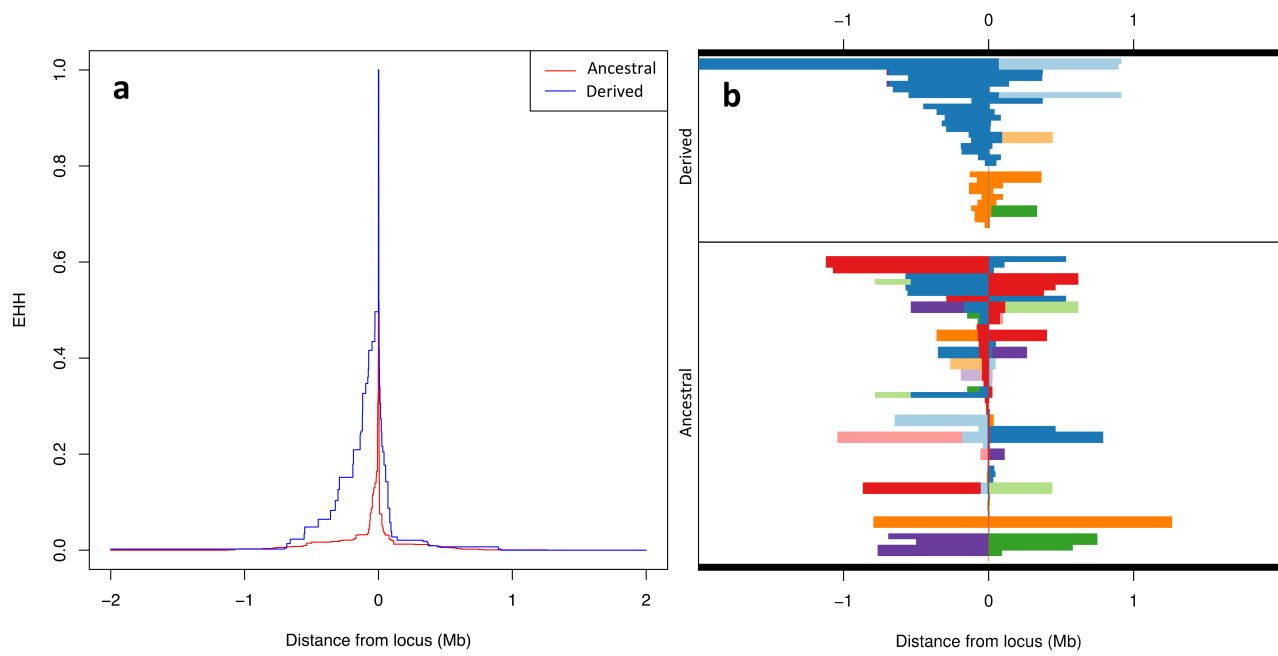

**Fig. S12.** Signals of Positive Selection at *ADH1B\*48His* in the Druze (Israel) population. (a) Plot of extended haplotype homozygosity (EHH) centered on rs1229984 (*ADH1B\*48His*). (b) Plot of haplotype structure for chromosomes carrying the derived and ancestral alleles at rs1229984. Each row is a haplotype, and for each site, adjacent haplotypes of the same color are identical in sequence between that site and the central (selected) site.

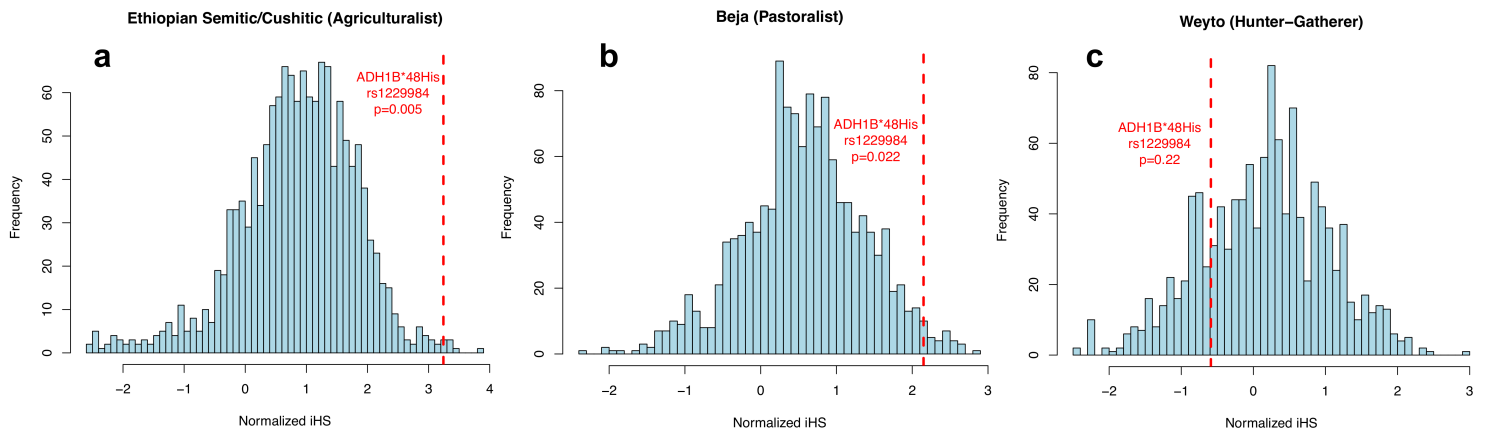

**Fig. S13.** Normalized iHS value of *ADH1B\*48His* (red dashed line) compared against a background set of frequency matched SNPs. Background SNPs have the same allele frequency as *ADH1B\*48His* in the Druze (introgression source), and a 0% frequency in the Nigerian Yoruba (YRI). *ADH1B\*48His* is an iHS outlier in the pooled Ethiopian Semitic/Cushitic agriculturalists (**a**), a more moderate outlier in the Beja pastoralists (**b**), and not significantly different from background levels in the Weyto hunter-gatherers (**c**).

| Population Label                                             | Country          | Ethnic Group Composition                                                                          | Language Family                   | Subsistence                                         | Data Source             |
|--------------------------------------------------------------|------------------|---------------------------------------------------------------------------------------------------|-----------------------------------|-----------------------------------------------------|-------------------------|
| Ethiopia Semitic/Cushitic*<br>(Total N = 220)                | Ethiopia         | Agaw (N=68)<br>Amhara (N=40)<br>Qimant (N=34)<br>Kistane (N=28)<br>Argobba (N=23)<br>Silte (N=27) | Afroasiatic –<br>Semitic/Cushitic | Agriculturalist/<br>Agropastoralist                 | Crawford et al. 2017    |
| Ethiopia Omotic*<br>(Total N = 89)                           | Ethiopia         | Dizi (N=31)<br>Hamer (N=30)<br>Sheko (N=28)                                                       | Afroasiatic - Omotic              | Agriculturalist/<br>Agropastoralist/<br>Pastoralist | Crawford et al. 2017    |
| Ethiopia Nilo-Saharan*<br>(Total N = 42)                     | Ethiopia         | Mursi (N=28)<br>Surma (N=14)                                                                      | Nilo-Saharan                      | Pastoralist                                         | Crawford et al. 2017    |
| Weyto                                                        | Ethiopia         | Weyto (N=35)                                                                                      | Afroasiatic - Cushitic            | Hunter Gatherer                                     | Crawford et al. 2017    |
| Chabu*                                                       | Ethiopia         | Chabu (N = 17)                                                                                    | Nilo-Saharan                      | Hunter Gatherer                                     | Crawford et al. 2017    |
| Tsamai                                                       | Ethiopia         | Tsamai (N=34)                                                                                     | Afroasiatic – Cushitic            | Agropastoralist                                     | Crawford et al. 2019    |
| Kafa                                                         | Ethiopia         | Kafa (N=38)                                                                                       | Afroasiatic - Omotic              | Agriculturalist                                     | Crawford et al. 2019    |
| Beja*<br>(Total N = 25)                                      | Sudan            | Baniamer (N=10)<br>Hadandawa (N=15)                                                               | Afroasiatic - Cushitic            | Pastoralist                                         | Scheinfeldt et al. 2019 |
| Dinka*                                                       | Sudan            | Dinka (N = 12)                                                                                    | Nilo-Saharan                      | Pastoralist                                         | Scheinfeldt et al. 2019 |
| Boni*                                                        | Kenya            | Boni (N = 20)                                                                                     | Afroasiatic - Cushitic            | Hunter Gatherer                                     | Scheinfeldt et al. 2019 |
| Dahalo*                                                      | Kenya            | Dahala (N = 14)                                                                                   | Afroasiatic - Cushitic            | Hunter Gatherer                                     | Scheinfeldt et al. 2019 |
| Eastern Cushitic*<br>(Total N = 30)                          | Kenya            | Gabraha (N = 9)<br>Gurreh (N=7)<br>Rendille (N=14)                                                | Afroasiatic - Cushitic            | Pastoralist                                         | Scheinfeldt et al. 2019 |
| Elmolo*                                                      | Kenya            | Elmolo (N = 13)                                                                                   | Afroasiatic - Cushitic            | Hunter Gatherer                                     | Scheinfeldt et al. 2019 |
| Niger-Congo-East*<br>(Total N = 25)                          | Kenya            | Pare (N=14)<br>Taita (N=9)<br>Taveta (N=2)                                                        | Niger-Congo                       | Agropastoralist                                     | Scheinfeldt et al. 2019 |
| Luo*                                                         | Kenya            | Luo (N = 32)                                                                                      | Nilo-Saharan                      | Pastoralist                                         | Scheinfeldt et al. 2019 |
| Ogiek*                                                       | Kenya            | Ogiek (N = 17)                                                                                    | Nilo-Saharan                      | Hunter Gatherer                                     | Scheinfeldt et al. 2019 |
| Southern Nilotic*<br>(Total N = 21)                          | Kenya            | Pokot (N = 5)<br>Sengwer (N=16)                                                                   | Nilo-Saharan                      | Agriculturalist                                     | Scheinfeldt et al. 2019 |
| Yaaku*                                                       | Kenya            | Yaaku (N = 15)                                                                                    | Afroasiatic - Cushitic            | Hunter Gatherer                                     | Scheinfeldt et al. 2019 |
| Datog*                                                       | Tanzania         | Datog (N = 18)                                                                                    | Nilo-Saharan                      | Agropastoralist                                     | Scheinfeldt et al. 2019 |
| Hadza*                                                       | Tanzania         | Hadzabe (N = 26)                                                                                  | Khoisan                           | Hunter Gatherer                                     | Scheinfeldt et al. 2019 |
| Iraqw*                                                       | Tanzania         | Iraqw (N = 23)                                                                                    | Afroasiatic - Cushitic            | Agropastoralist                                     | Scheinfeldt et al. 2019 |
| Sandawe*                                                     | Tanzania         | Sandawe (N = 29)                                                                                  | Khoisan                           | Hunter Gatherer                                     | Scheinfeldt et al. 2019 |
| Mada*                                                        | Cameroon         | Mada (N = 19)                                                                                     | Afroasiatic                       | Agriculturalist                                     | Scheinfeldt et al. 2019 |
| West Rainforest Hunter<br>Gatherer (WRHG)*<br>(Total N = 67) | Cameroon         | Baka (N = 25)<br>Bakola (N=29)<br>Bedzan (N=13)                                                   | Niger-Congo                       | Hunter Gatherer                                     | Scheinfeldt et al. 2019 |
| Niger-Congo-West*<br>(Total N = 70)                          | Cameroon/Nigeria | Lemande (N = 19)<br>Ngumba (N=20)<br>Tikar South (N=19)<br>Yoruba (N=12)                          | Niger-Congo                       | Agriculturalist                                     | Scheinfeldt et al. 2019 |
| Fulani*<br>(Total N = 40)                                    | Cameroon/Nigeria | Fulani Cameroon (N = 16)<br>Fulani Nigeria (N=8)<br>Mbororo Fulani<br>Cameroon (N=16)             | Niger-Congo                       | Pastoralist                                         | Scheinfeldt et al. 2019 |
| Bulala*                                                      | Chad             | Bulala (N = 12)                                                                                   | Nilo-Saharan                      | Agropastoralist                                     | Scheinfeldt et al. 2019 |

**Table S1.** Population groupings and ethnic group composition used for genome-wide scans of positive selection. Populations marked with an asterisk were included in the  $D_i$  calculations.

| Chr | Position (hg19) | iHS   (pval)          | Ancestral | Derived | Gene  | Function          | rsID        |
|-----|-----------------|-----------------------|-----------|---------|-------|-------------------|-------------|
| 4   | 100532602       | 2.01953 (0.04471436)  | G         | A       | MTTP  | nonsynonymous SNV | rs113337987 |
| 4   | 100239319       | 2.07323 (0.03957207)  | C         | T       | ADH1B | nonsynonymous SNV | rs1229984   |
| 4   | 100349669       | 2.87947 (0.005451212) | C         | G       | ADH7  | nonsynonymous SNV | rs1573496   |

**Table S2.** Integrated haplotype scores (iHS) for 3 nonsynonymous variants in the Druze population from Israel. iHS was calculated genome-wide using high coverage HGDP data (Bergström, et al. 2019). iHS was normalized based on derived allele frequency, and the absolute value and empirical p values are shown.
